# Supplementary material
Source: Springer Nature journal article supplement (https://www.springermedizin.de/resource/supplementary/12885_2011_2926_MOESM4_ESM.pdf/9462300)

(A)

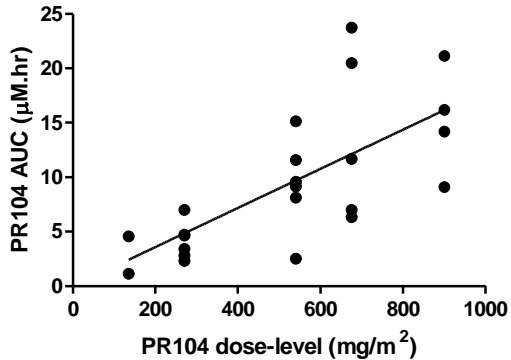

(B)

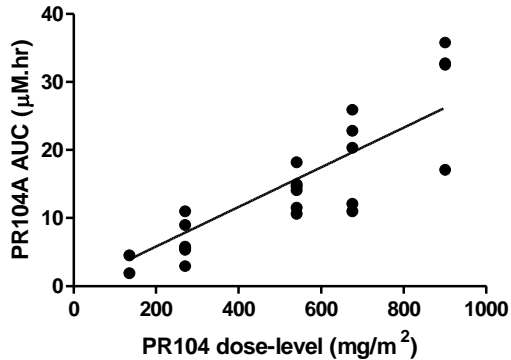

Supplement: MOESM4 [file 9462300]
